# Supplementary material for: MiR-23b and miR-133 cotarget TGFβ2/NOTCH1 in dermal fibroblasts and affect hair follicle development in sheep
Source: Research Square preprint supplement (doi:10.21203/rs.3.rs-3121043/v1), 2023-08-16
Supplement: Supplementary file 1 [file 09ff3818e0b8e14804d8c7fc.xlsx]

## Sheet: Sheet1
Table S2 Sequences of RT-qPCR primers
Pathway	Gene	Primer	Product length(bp)
PI3K-Akt/MAPK	FGF7	F: GCCCCGAGCGACATACAAGAAG	129
		R: TCTCTTGGGTTCCCTTTGACTTTGC
--	HOXC13	F: GCTGCCGCCTGTCTCACAAC	187
		R: ACCGACACGTCCAGGTAGCC
TGF-β/Hippo	TGFβ1	F: ACTACTACGCCAAGGAGGTCACC	140
		R: CACAGGTTCAGGCACTGCTTCC
TGF-β/Hippo	BMP2	F: GTCCTGAGCGAGTTCGAGTTGC	117
		R: CGAGTGCTGGCGGTACAAGTC
TGF-β	INHBA	F: GGCGAGTTGCTGGATTATAGTGAGG	122
		R: GCTGAGAGTTGGGTACATCCTTTGG
TGF-β	SAMD5	F: CTGGTGAGCTACCCGAAACTGAAG	125
		R: AAGAACTCTAGGATGCCAGCCATTG
TGF-β/Hippo	TGFβ3	F: GCTTCCGCAATCTGGAGGAGAAC	118
		R: CCTGAGCAGAAGTTGGCATAGTAGC
WNT	DKK1	F: CCAGCGTTGTTACTGTGGAGAAGG	86
		R: AGGTGTGAAGCCTGGAAGAATTGC
WNT/Hippo	FZD3	F: AGAGATAGTGAACGAGAGCCGACAG	128
		R: CATGTGTGGATGTCCCTTGAGTGG
WNT/Hippo	FZD6	F: CCCCAAAGAGTGATGTCCCTGAAAG	118
		R: GAAGCCGAATGAACAAGCAGTGATG
WNT	LGR4	F: CTACGACTGCGGCATGTACTCAC	86
		R: ACACTGGCTTTGTCAACAGGAAGG
WNT/Hippo	WNT5A	F: CTACCGCTTCGCCAAGGAGTTC	105
		R: TCGTTGTTGTGCAGGTTCATCAGG
--	GAPDH	F: GAGATCAAGAAGGTGGTGAAGCAG	113
		R: GTAGAAGAGTGAGTGTCGCTGTTG
