# Supplementary material for: MiR-23b and miR-133 cotarget TGFβ2/NOTCH1 in dermal fibroblasts and affect hair follicle development in sheep
Source: Research Square preprint supplement (doi:10.21203/rs.3.rs-3121043/v1), 2023-08-16
Supplement: Supplementary file 2 [file 3dd883cca5bb0a0d9458a9c9.xlsx]

## Sheet: Sheet1
Table S1 RT-qPCR primers for miRNA and candidate target genes
Gene	Primer
oar-oar-miR-23b	F: CGCGCGatcacattgccagggatt
oar-oar-miR-133	F: CGttggtccccttcaaccagctgt
U6	F: CTCGCTTCGGCAGCACA
	R: AACGCTTCACGAATTTGCGT
NOTCH1	F: TATCTGCATGCCTGGCTACG
	R: GTCCACGTCATACTGGCACA
TGFβ2	F: AGCGGAGCGACGAGGAATACTAC
	R: CACTGAGCCAGAGGGTGTTGTAAC
GAPDH	F: GAGATCAAGAAGGTGGTGAAGCAG
	R: GTAGAAGAGTGAGTGTCGCTGTTG
