# Supplementary material for: MiR-23b and miR-133 cotarget TGFβ2/NOTCH1 in dermal fibroblasts and affect hair follicle development in sheep
Source: Research Square preprint supplement (doi:10.21203/rs.3.rs-3121043/v1), 2023-08-16
Supplement: Supplementary file 3 [file 6e2f606a9f77fc3cc5554e32.docx]

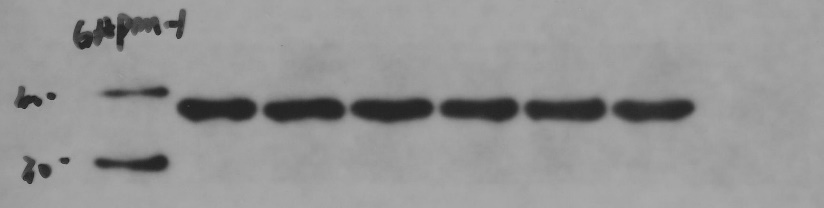
GAPDH
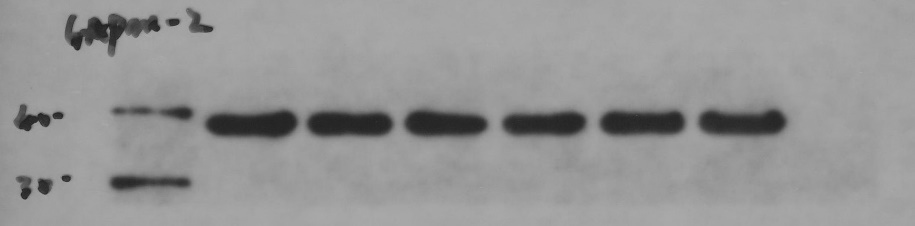
GAPDH

**miR-133 inhibitor**

**miR-133 mimic**

**inhibitor-NC**

**mimic-NC**

**miR-23b inhibitor**

**miR-23b mimic**

**marker**


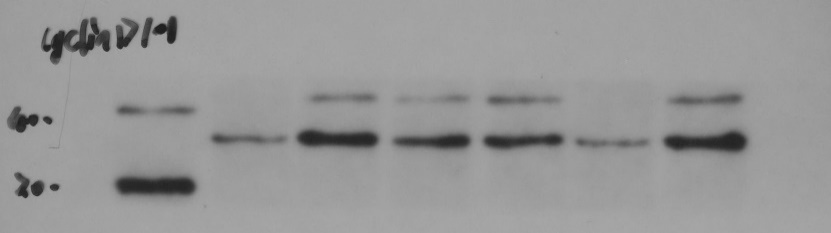
Cyclin D1
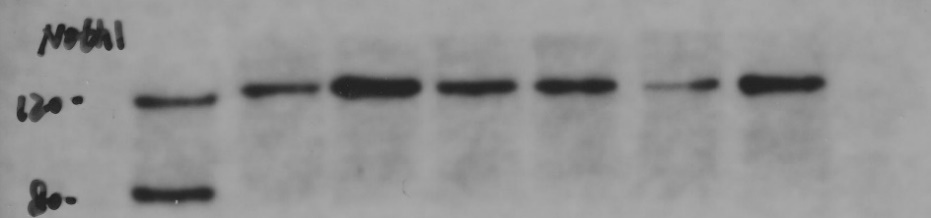
NOTCH1


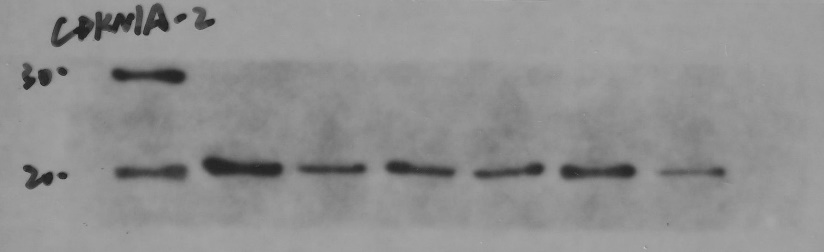
CDKN1A
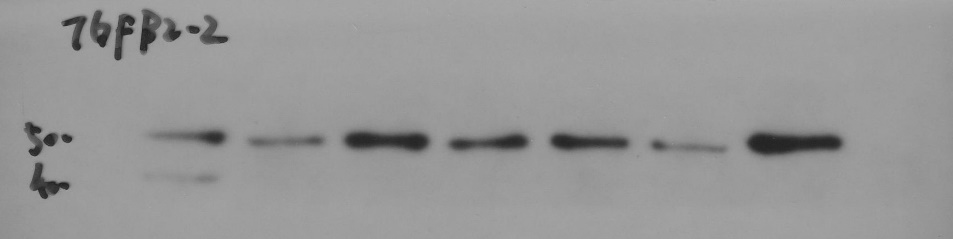
TGFβ2


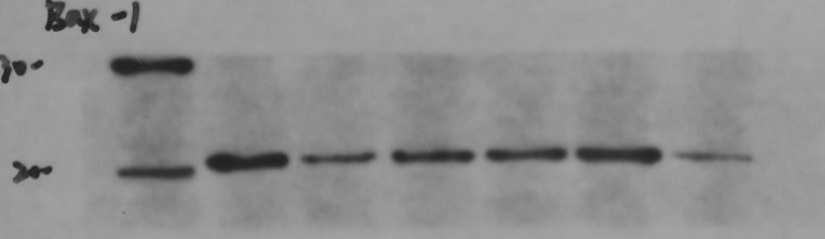
BAX


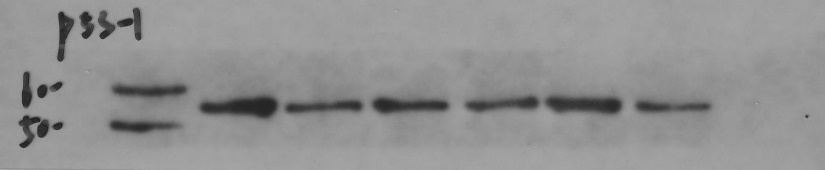
P53

Fig S5. Original image of Western blotting. The order of loading is **marker, miR-23b mimic, miR-23b inhibitor, mimic-NC, inhibitor-NC, miR-133 mimic, miR-133 inhibitor**. The red box represents the part of the manuscript where the images are displayed.
