# Supplementary material for: MiR-23b and miR-133 cotarget TGFβ2/NOTCH1 in dermal fibroblasts and affect hair follicle development in sheep
Source: Research Square preprint supplement (doi:10.21203/rs.3.rs-3121043/v1), 2023-08-16
Supplement: Supplementary file 4 [file 70892005e74983ed8e674d29.docx]

Fig S4. oar-miR-133 target genes top 30 KEGG functional enrichment histogram.
