# Supplementary material for: MiR-23b and miR-133 cotarget TGFβ2/NOTCH1 in dermal fibroblasts and affect hair follicle development in sheep
Source: Research Square preprint supplement (doi:10.21203/rs.3.rs-3121043/v1), 2023-08-16
Supplement: Supplementary file 5 [file a0afbeb7263538eb5caa8c03.xlsx]

## Sheet: Sheet1
Table S3 wild type primers and mutant sequences of binding sites in candidate target genes
miRNA	ID	Primers (5' to 3')	Size (bp)
oar-miR-23b	TGFβ2-WT	F: CCctcgagTTCCTTTTCTTGGAATTTCCTGGC	306
		R :TAAAgcggccgcCAGTGCATTCATGAGGAAAGACAAAATAAT
	TGFβ2-MUT	ctcgagCTTCCTTTTCTTGGAATTTCCTGGCCATTATTAAAATGACAAATTGGATTTGTTTGAAAACTGGAAAAGCAAGAGATAGGATGCCACAATACCAAATAACCTTTGGATTGGGTGAAACCCAATCCCAGATACCTCACACTTGGTTTTTTTTTTTTTTTTTTTTTTTCCTCTCTTCCACTTTTCTATTCATTCTATGTAAATCACTTTTATTTCTGCAGGTATTTTCTTCTCAGATAGAATGACATTTTTGTTTTGTATTATTTTGTCTTTCCTCATGAATGCACTGgcggccgc	300
	NOTCH1-WT	F: CCctcgagACCTCAACTTGAACTGCATCTCCC	228
		R: TAAAgcggccgcTGCTGGGACTGGTGGCC
	NOTCH1-MUT	ctcgagTTGTTGGAGGCACCTCAACTTGAACTGCATCTCCCAGGTTCAGTGGAAGATAAACTGGCGCCCCTGCGGCCCAGTGCTGACGGGCCTGGTTTTTATAGGAGACTTGGAAATTACACCGCGTGTCCAGCCTCAGTGCTCAGAGACCCTGGTGCCAGGGCCTGGCGCGCCCTGCGGTGCTCGGGTCACCAGGAGCCTGCTCGCGGGCCACCAGTCCCAGCACCCAGGgcggccgc	239
oar-miR-133	TGFβ2-WT	F: CCctcgagTAGTTTGGGGGGTTCTATAAGGCCT	282
		R: TAAAgcggccgcCCACTAGAGCACCACAAAAACAGAC
	TGFβ2-MUT	ctcgagAGTTTGGGGGGTTCTATAAGGCCTTTATTTCCCAAAAGTAAATATTGCCATGAGACGGGAGGGAGGTGGGAGGGAATGGGGAAAATGTTAGTATGTGGGTGGGTTCCCCGATCAGTTTTTCTGTGTTAAACAGCAATGCAGTTTTATGGTTGGCATGATTTTTTTTTTAAATGGAACATAAGAATAGCTGTTTTGTATTTTGATGACTGATTACGCTGTATTTTAACACAATGTATGTCTGTTTTTGTGGTGCTCTAGTGGgcggccgc	275
	NOTCH1-WT	ctcgagCTGCAGCTGCCGAACCGTAGCTCCTGAGAGCAAAGCCGGGGGGTCCCGACGCCCACCGCACTGAGTCTGCTGCCCCGGCCTCGCCGGGCGTGCTGTGGGGCCACCCCTAGTGGGCACGATCAGACTCTTCCTAAGATGTGGTTTCTTTTTGTGTTTTATAAGATAGAGTGTAGTTTACATAAAAAGAAAACTTTTTAAAAgcggccgc	214
	NOTCH1-MUT	ctcgagCTGCAGCTGCCGAACCGTAGCTCCTGAGAGCAAAGCCGGGGGGTCCCGACGCCCACCGCACTGAGTCTGCTGCCCCGGCCTCGCCGGGCGTGCTGTAAAATTGCCCCTAGTGGGCACGATCAGACTCTTCCTAAGATGTGGTTTCTTTTTGTGTTTTATAAGATAGAGTGTAGTTTACATAAAAAGAAAACTTTTTAAAAgcggccgc	214
Note:The base with single underline in small letters is the Restriction enzyme cutting sites of Xho Ⅰ and not Ⅰ, and the base with double underline in capital letters is the protective base
