# Supplementary material for: MiR-23b and miR-133 cotarget TGFβ2/NOTCH1 in dermal fibroblasts and affect hair follicle development in sheep
Source: Research Square preprint supplement (doi:10.21203/rs.3.rs-3121043/v1), 2023-08-16
Supplement: Supplementary file 6 [file e53fb1c40771b58d43a9a5b8.docx]

Fig S3. oar-miR-23b target genes top 30 KEGG functional enrichment histogram.
